# Supplementary material for: Study of mitotic chromatin supports a model of bookmarking by histone modifications and reveals nucleosome deposition patterns
Source: PubMed Central journal article supplement — Genome Res. 2018 Oct;28(10):1455–66. doi: 10.1101/gr.230300.117 (PMC6169886; doi:10.1101/gr.230300.117), 2018-10
Supplement: supp_gr.230300.117_Supplemental_Fig_S1.pdf [file supp_gr.230300.117_Supplemental_Fig_S1.pdf]

### Percentage of Reads Mapping to ChromHMM Genomic Regions

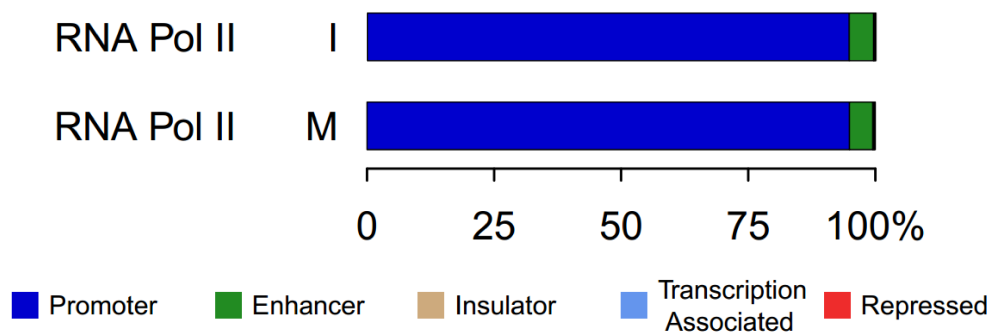

**Figure S1. RNA PolII binds almost exclusively at promoters.** Bar plots showing the percentage of reads in peak regions per ChromHMM category for interphase (I) and mitosis (M).
