# Supplementary material for: Study of mitotic chromatin supports a model of bookmarking by histone modifications and reveals nucleosome deposition patterns
Source: PubMed Central journal article supplement — Genome Res. 2018 Oct;28(10):1455–66. doi: 10.1101/gr.230300.117 (PMC6169886; doi:10.1101/gr.230300.117), 2018-10
Supplement: supp_gr.230300.117_Supplemental_Fig_S2.pdf [file supp_gr.230300.117_Supplemental_Fig_S2.pdf]

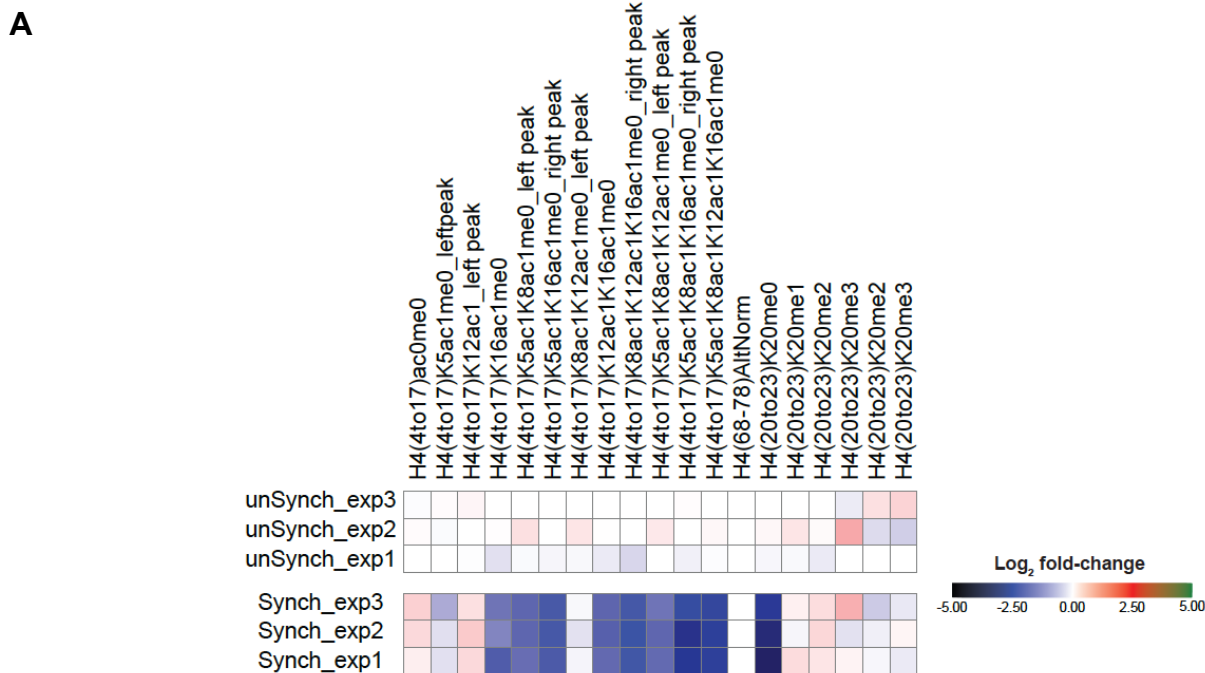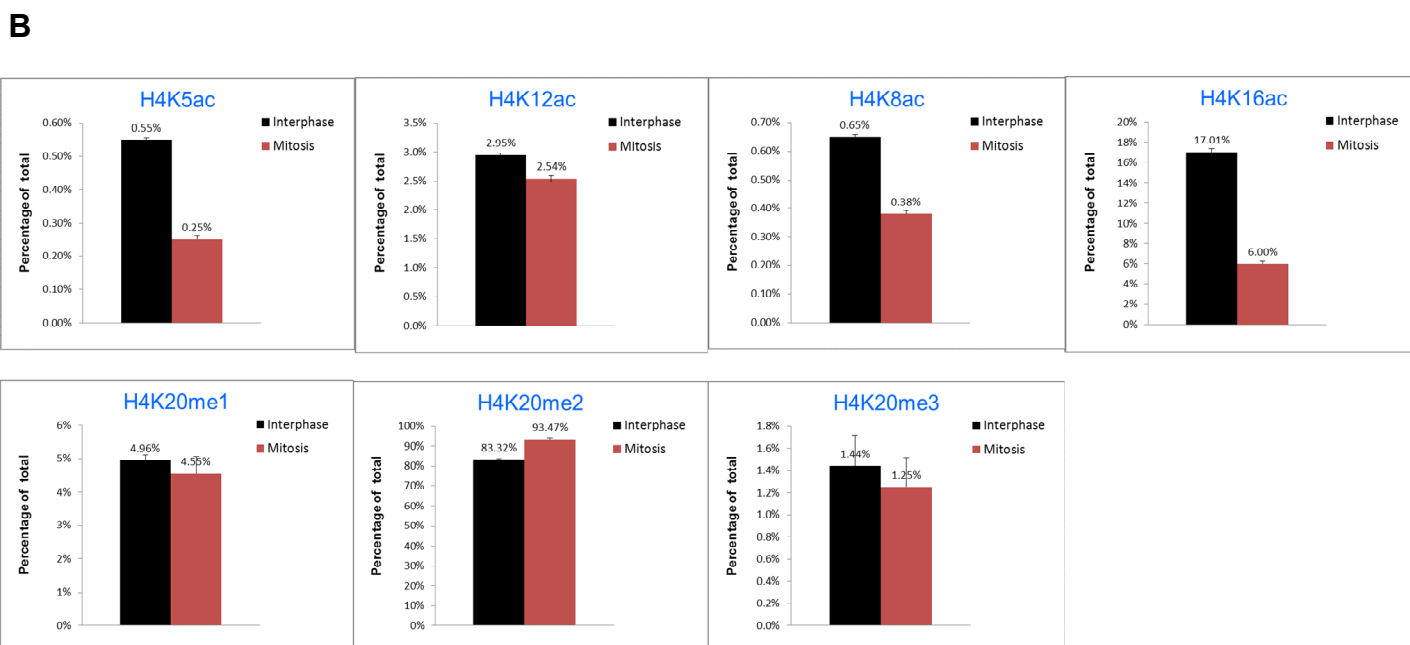

**Figure S2. Identification of global changes in histone H4 modifications by quantitative targeted mass spectrometry analysis. (A)** Heat map (log<sub>2</sub> of fold change) of the different histone modifications as detailed on top. Data was normalized to average signal of interphase samples. **(B)** Relative abundance of selected modifications on H4 tails from interphase or mitotic HeLa-S3 cells. The data was obtained by quantitative targeted mass spectrometry analysis. Each bar represents the percentage of the H4 peptides with the indicated modifications within the total H4 tail peptide population.
