# Supplementary material for: Study of mitotic chromatin supports a model of bookmarking by histone modifications and reveals nucleosome deposition patterns
Source: PubMed Central journal article supplement — Genome Res. 2018 Oct;28(10):1455–66. doi: 10.1101/gr.230300.117 (PMC6169886; doi:10.1101/gr.230300.117), 2018-10
Supplement: supp_gr.230300.117_Supplemental_Fig_S3.pdf [file supp_gr.230300.117_Supplemental_Fig_S3.pdf]

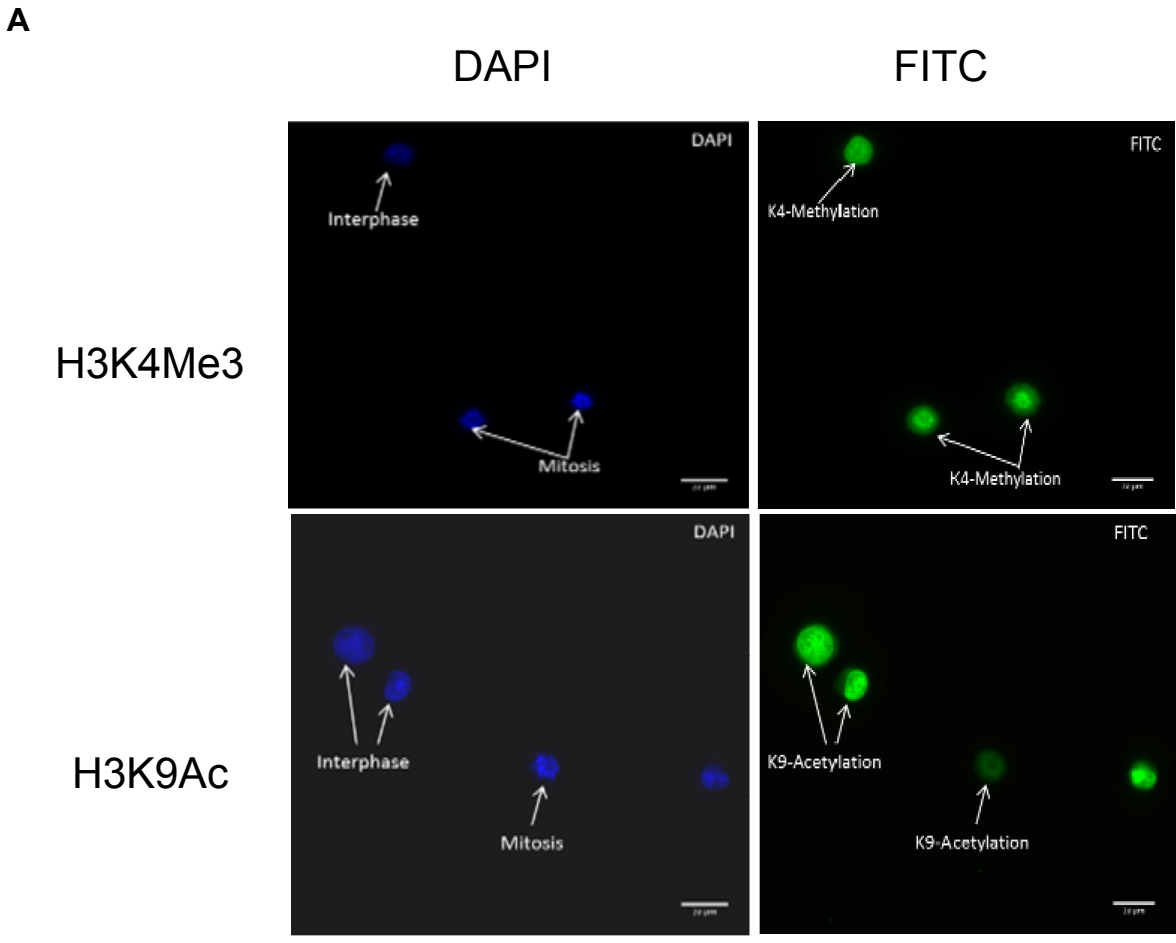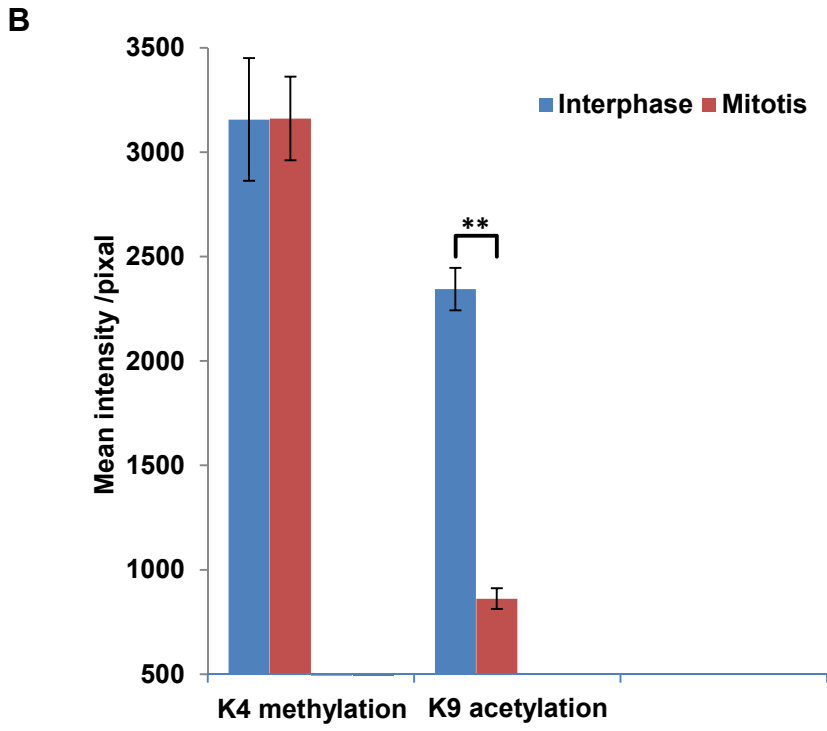

**Figure S3. Immunofluorescence analysis of H3K9ac and H3K4me3 levels in mitotic samples. (A)** A representative immunofluorescence picture of H3K4me3 and H3K9ac (green) and DAPI (blue) staining. The cell cycle stage was determined from the DAPI image. **(B)** Quantification of the green signal intensity in multiple (N>28) mitotic and interphase cells. Average and standard error are shown. The difference between interphase and mitotic cells for H3K9ac was highly significant (p-value < 10<sup>-23</sup>; two sided t-test).
