# Supplementary material for: Study of mitotic chromatin supports a model of bookmarking by histone modifications and reveals nucleosome deposition patterns
Source: PubMed Central journal article supplement — Genome Res. 2018 Oct;28(10):1455–66. doi: 10.1101/gr.230300.117 (PMC6169886; doi:10.1101/gr.230300.117), 2018-10
Supplement: supp_gr.230300.117_Supplemental_Fig_S7.pdf [file supp_gr.230300.117_Supplemental_Fig_S7.pdf]

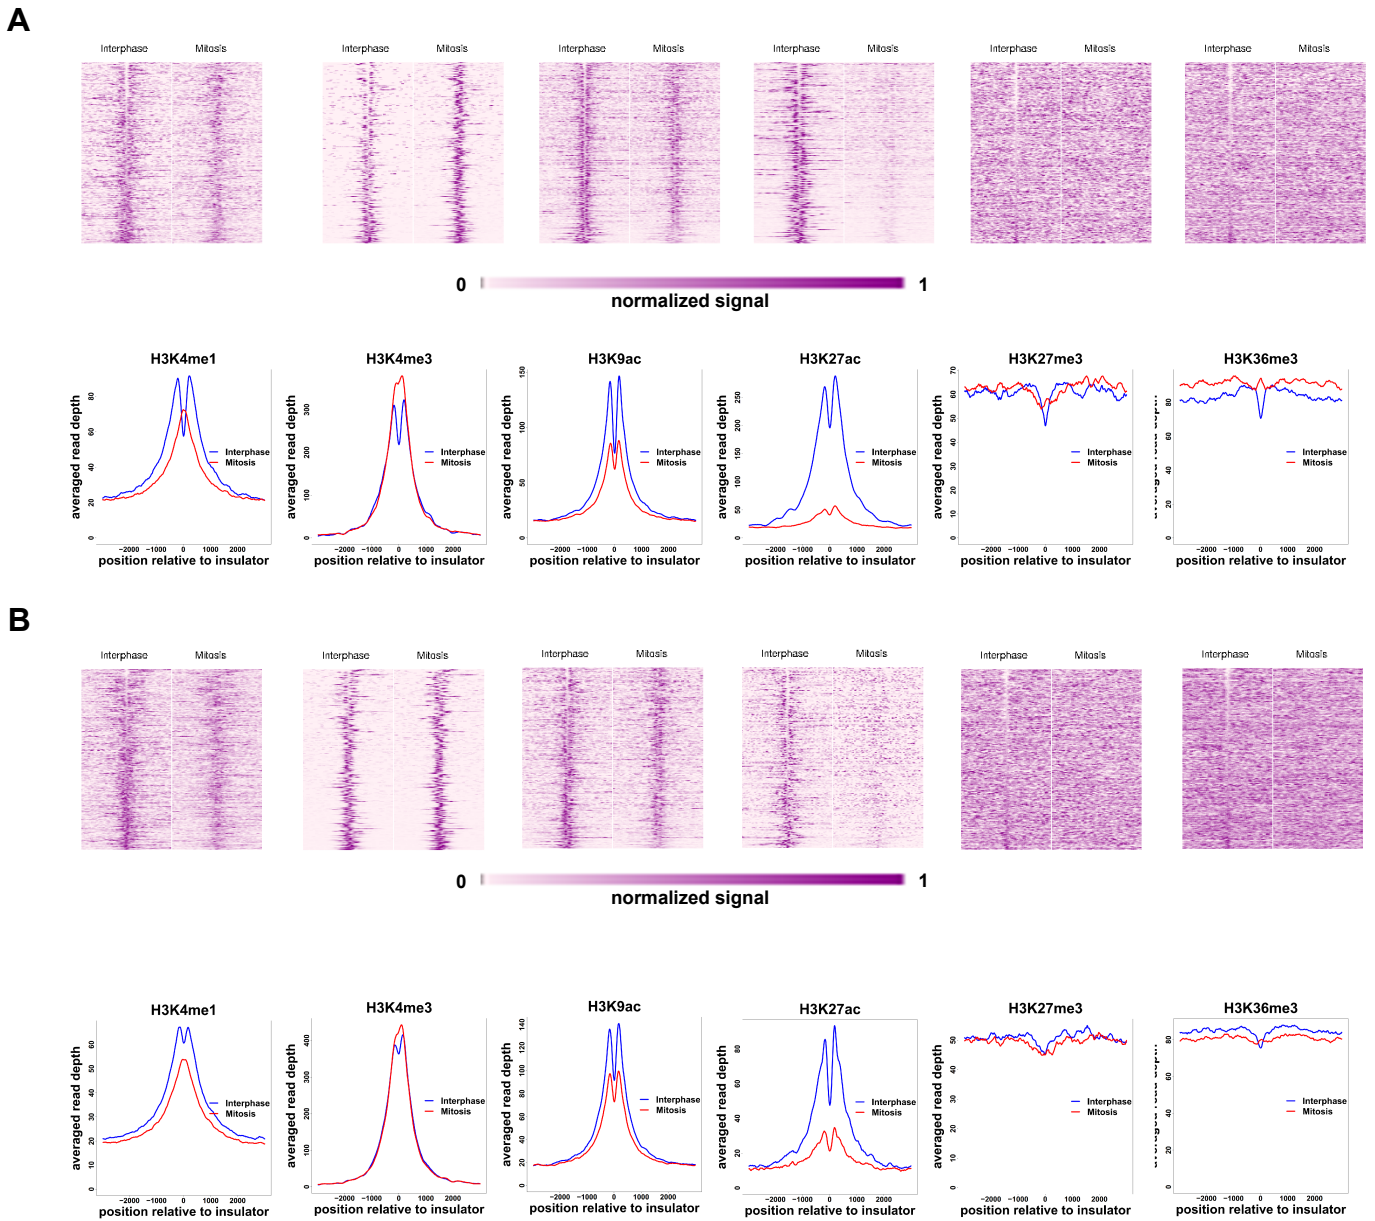

**Figure S7. Insulator centered heat maps and metagenes.** Heat maps showing the normalized and standardized read depth at 6kb regions centered at insulators for all histone modifications that overlapped insulators, for data obtained from two biological replicates (**A and B**). Metagenes plots showing the average read depth are below the heat maps.
