# Supplementary material for: Study of mitotic chromatin supports a model of bookmarking by histone modifications and reveals nucleosome deposition patterns
Source: PubMed Central journal article supplement — Genome Res. 2018 Oct;28(10):1455–66. doi: 10.1101/gr.230300.117 (PMC6169886; doi:10.1101/gr.230300.117), 2018-10
Supplement: supp_gr.230300.117_Supplemental_Fig_S8.pdf [file supp_gr.230300.117_Supplemental_Fig_S8.pdf]

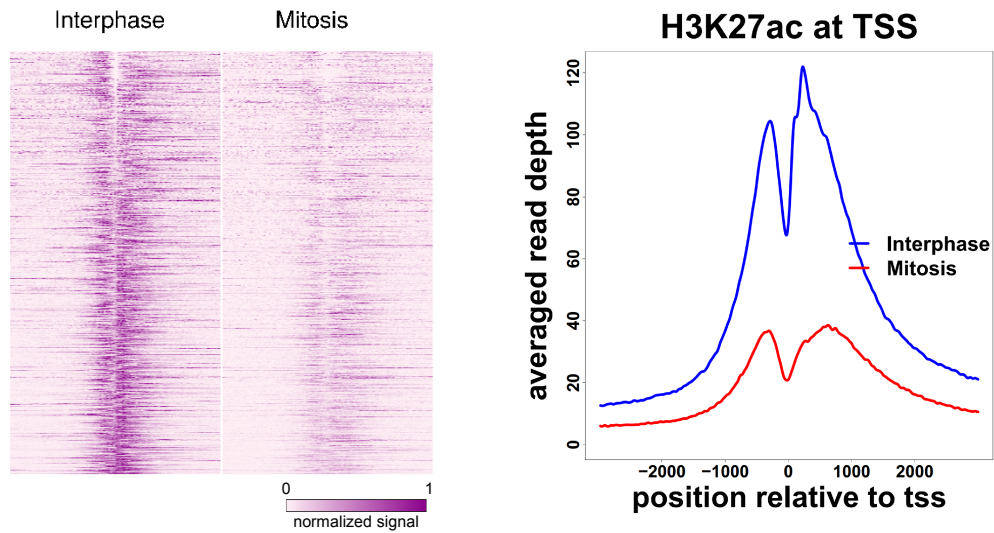

**Figure S8. H3K27ac does not penetrate the NDR during mitosis in G1E murine erythroblast cells.** Heat map showing the normalized and standardized read depth at 6kb regions centered at TSSs using data from a previous study on G1E murine erythroblast cells (Hsiung et al. 2016). Metagenome plot showing the average read depth is beside the heat map.
