# Supplementary material for: Study of mitotic chromatin supports a model of bookmarking by histone modifications and reveals nucleosome deposition patterns
Source: PubMed Central journal article supplement — Genome Res. 2018 Oct;28(10):1455–66. doi: 10.1101/gr.230300.117 (PMC6169886; doi:10.1101/gr.230300.117), 2018-10
Supplement: supp_gr.230300.117_Supplemental_Fig_S10.pdf [file supp_gr.230300.117_Supplemental_Fig_S10.pdf]

|    | Motif    | Logo | RC Logo | E-value  | Unersased E-value |
|----|----------|------|---------|----------|-------------------|
| 1. | CGCCSCSC |      |         | 7.9e-123 | 7.9e-123          |
| 2. | CGGSGSCG |      |         | 8.1e-085 | 5.2e-101          |
| 3. | CGSGCSG  |      |         | 3.6e-073 | 1.9e-083          |
| 4. | GCCGSSS  |      |         | 1.7e-046 | 4.5e-052          |
| 5. | GCGSGS   |      |         | 3.9e-032 | 4.7e-038          |
| 6. | CGSSGC   |      |         | 3.2e-016 | 5.4e-031          |
| 7. | CGGSC    |      |         | 3.0e-006 | 4.8e-018          |
| 8. | GCGCYC   |      |         | 2.5e-004 | 1.1e-047          |
| 9. | CCCHCCCC |      |         | 1.3e-003 | 1.4e-010          |

**Figure S10. Group 1 enriched motifs.** Motifs found enriched in group 1 versus the other groups, using the Discriminative Regular Expression Motif Elicitation (DREME) (Bailey 2011).
