# Supplementary material for: Study of mitotic chromatin supports a model of bookmarking by histone modifications and reveals nucleosome deposition patterns
Source: PubMed Central journal article supplement — Genome Res. 2018 Oct;28(10):1455–66. doi: 10.1101/gr.230300.117 (PMC6169886; doi:10.1101/gr.230300.117), 2018-10
Supplement: supp_gr.230300.117_Supplemental_Fig_S11.pdf [file supp_gr.230300.117_Supplemental_Fig_S11.pdf]

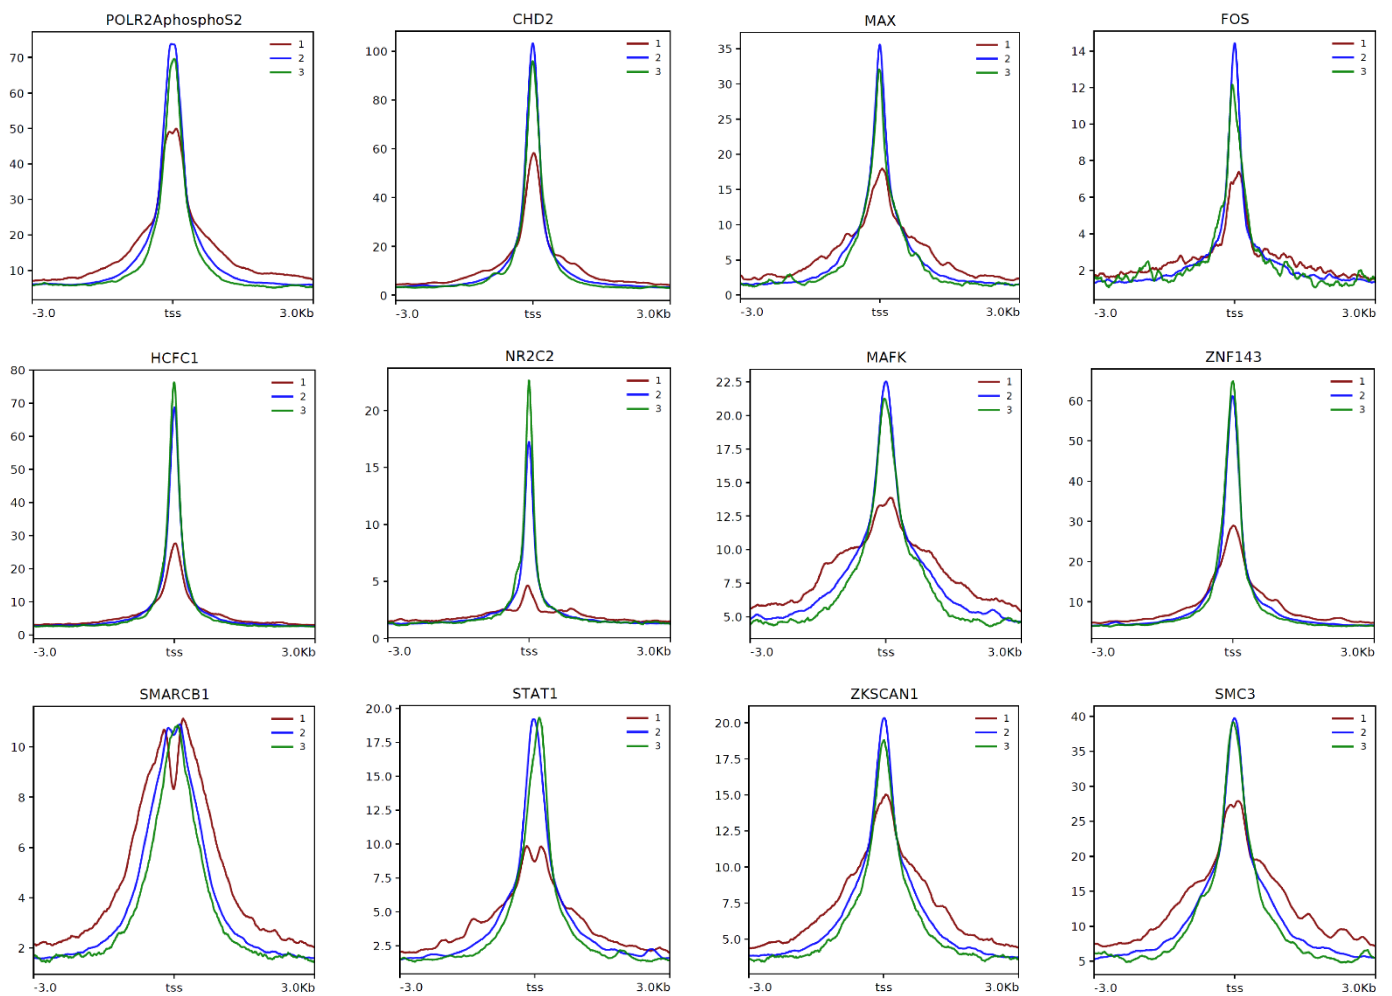

**Figure S11. TSS centered transcription factor ChIP-seq ENCODE data.** Metagene plots showing HeLa-S3 ENCODE ChIP-seq data for Groups 1-3. Only factors with counts higher than 10 are shown. See **Supplemental Table S2** for a comprehensive list of p-values for all between-group comparisons.
