# Supplementary material for: Study of mitotic chromatin supports a model of bookmarking by histone modifications and reveals nucleosome deposition patterns
Source: PubMed Central journal article supplement — Genome Res. 2018 Oct;28(10):1455–66. doi: 10.1101/gr.230300.117 (PMC6169886; doi:10.1101/gr.230300.117), 2018-10
Supplement: supp_gr.230300.117_Supplemental_Fig_S12.pdf [file supp_gr.230300.117_Supplemental_Fig_S12.pdf]

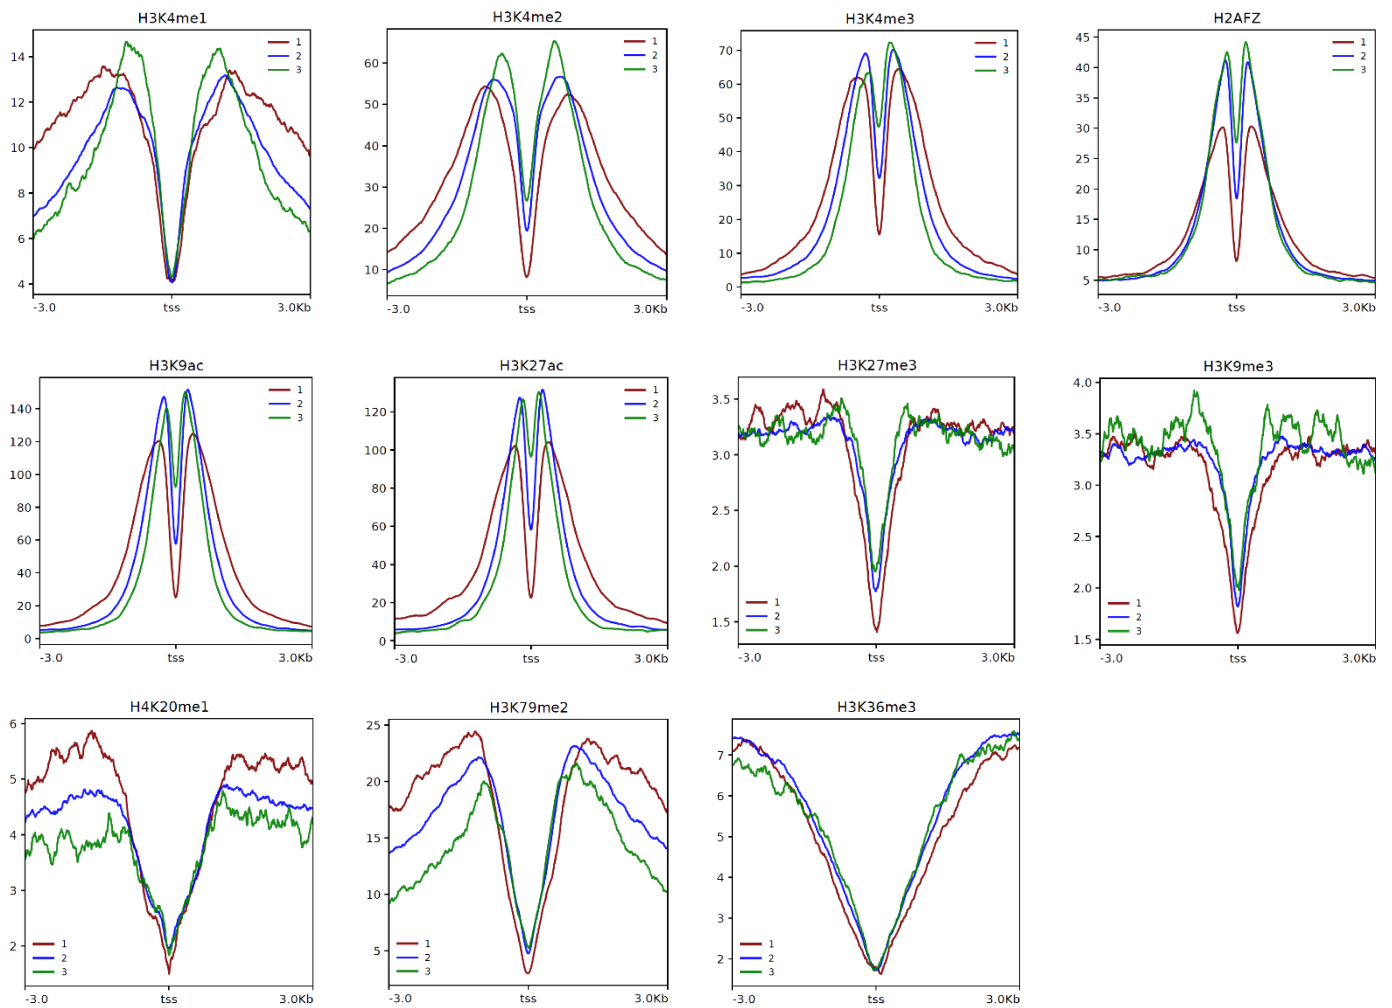

**Figure S12. TSS centered histone modification CHIP-seq ENCODE data.** Metagenes plots showing all HeLa-S3 histone modification ENCODE ChIP-seq data for groups 1-3. See **Supplemental Table S2** for a comprehensive list of p-values for all between-group comparisons.
