# Supplementary material for: Study of mitotic chromatin supports a model of bookmarking by histone modifications and reveals nucleosome deposition patterns
Source: PubMed Central journal article supplement — Genome Res. 2018 Oct;28(10):1455–66. doi: 10.1101/gr.230300.117 (PMC6169886; doi:10.1101/gr.230300.117), 2018-10
Supplement: supp_gr.230300.117_Supplemental_Fig_S13.pdf [file supp_gr.230300.117_Supplemental_Fig_S13.pdf]

## Enriched GO terms

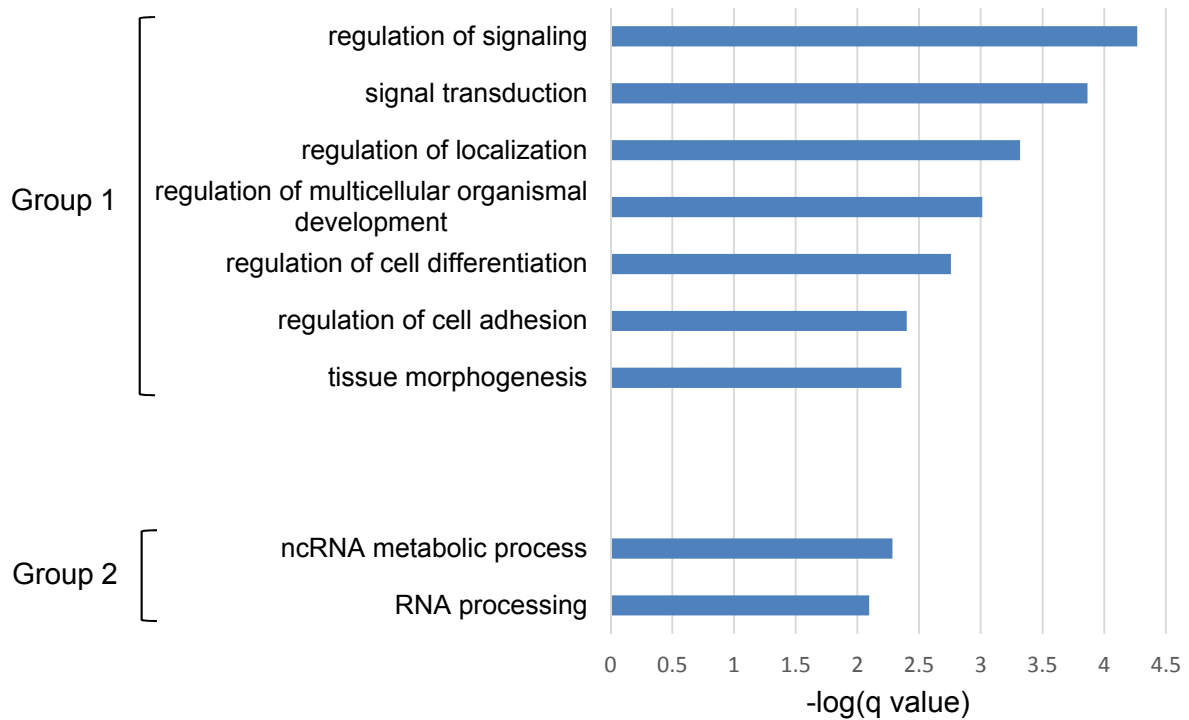

**Figure S13. Enriched GO terms found for the genes in *Groups 1* and *2*.** Biological processes enriched in *Groups 1* and *2* based on GO analysis. The x-axis is the  $-\log$  of the FDR q-value as calculated by the GOrilla online tool (Eden et al. 2009). Note that *Group 3* did not yield significant results.
