# Supplementary material for: Study of mitotic chromatin supports a model of bookmarking by histone modifications and reveals nucleosome deposition patterns
Source: PubMed Central journal article supplement — Genome Res. 2018 Oct;28(10):1455–66. doi: 10.1101/gr.230300.117 (PMC6169886; doi:10.1101/gr.230300.117), 2018-10
Supplement: supp_gr.230300.117_Supplemental_Fig_S14.pdf [file supp_gr.230300.117_Supplemental_Fig_S14.pdf]

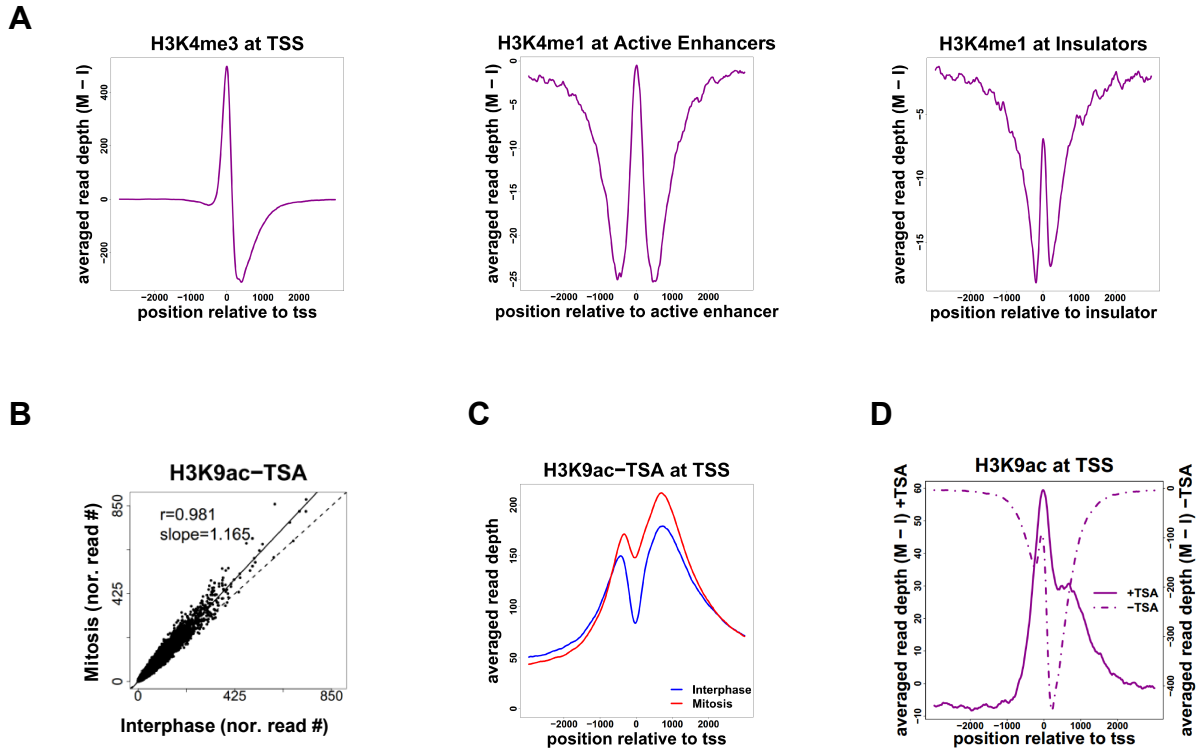

**Figure S14. Nucleosome shifting and deacetylation may explain NDR disappearance (biological replicate).** **(A)** Delta metagene plots showing the average read depth of the indicated modifications after subtracting the interphase depths from the mitotic depths. **(B)** A Scatter plot showing the normalized read counts at H3K9ac peaks on cells treated with TSA in mitosis versus interphase. **(C)** Metagene plot for H3K9ac data after TSA treatment. **(D)** Delta metagene plot for H3K9ac data before (dotted line) and after (solid line) TSA treatment.
