# Supplementary material for: Study of mitotic chromatin supports a model of bookmarking by histone modifications and reveals nucleosome deposition patterns
Source: PubMed Central journal article supplement — Genome Res. 2018 Oct;28(10):1455–66. doi: 10.1101/gr.230300.117 (PMC6169886; doi:10.1101/gr.230300.117), 2018-10
Supplement: supp_gr.230300.117_Supplemental_Fig_S15.pdf [file supp_gr.230300.117_Supplemental_Fig_S15.pdf]

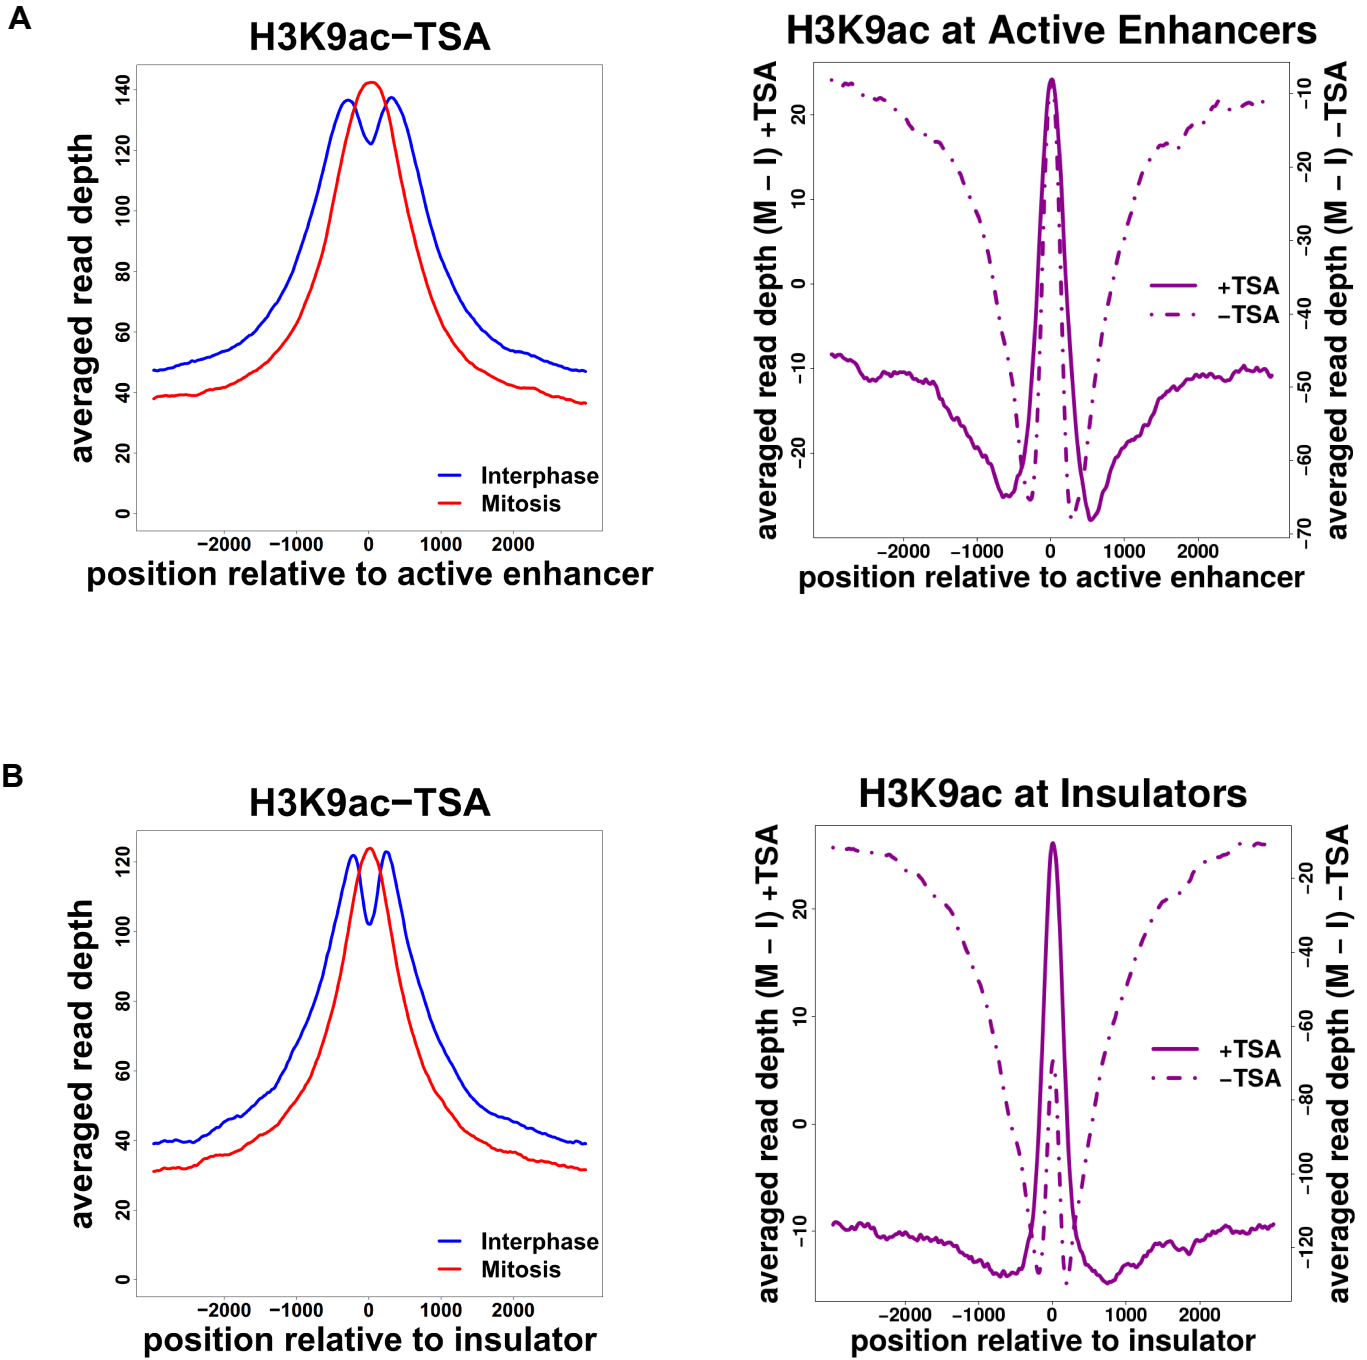

**Figure S15. TSA treatment affects nucleosome positioning in enhancers and insulators.** Metagene plots of H3K9ac data after TSA treatment and delta metagene plots of H3K9ac data before (dotted line) and after (solid line) TSA treatment for NDRs associated with enhancers (**A**) and insulators (**B**).
