# Supplementary material for: Study of mitotic chromatin supports a model of bookmarking by histone modifications and reveals nucleosome deposition patterns
Source: PubMed Central journal article supplement — Genome Res. 2018 Oct;28(10):1455–66. doi: 10.1101/gr.230300.117 (PMC6169886; doi:10.1101/gr.230300.117), 2018-10
Supplement: supp_gr.230300.117_Supplemental_Fig_S16.pdf [file supp_gr.230300.117_Supplemental_Fig_S16.pdf]

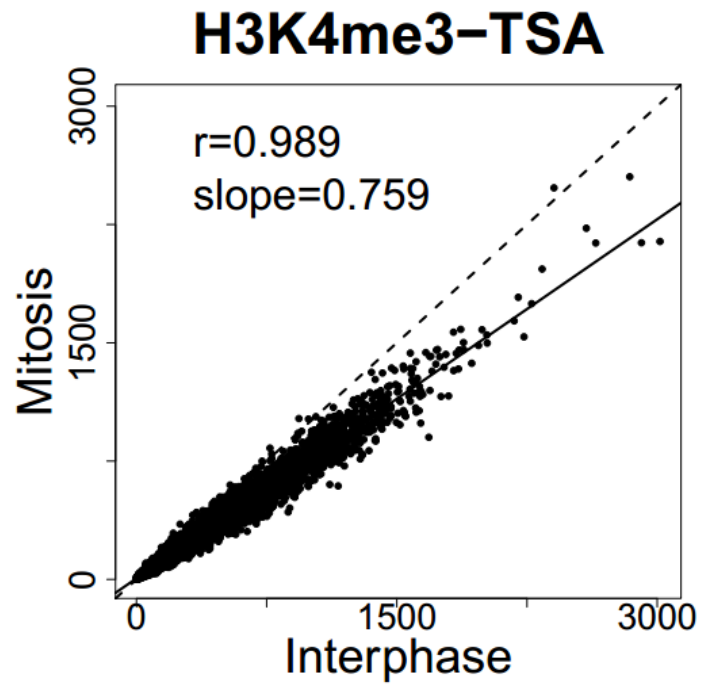

**Figure S16. TSA does not affect H3K4me3 localization.** A scatter plot showing the normalized read counts at H3K4me3 peaks on cells treated with TSA in mitosis versus interphase.
