# Supplementary material for: Study of mitotic chromatin supports a model of bookmarking by histone modifications and reveals nucleosome deposition patterns
Source: PubMed Central journal article supplement — Genome Res. 2018 Oct;28(10):1455–66. doi: 10.1101/gr.230300.117 (PMC6169886; doi:10.1101/gr.230300.117), 2018-10
Supplement: supp_gr.230300.117_Supplemental_Fig_S18.pdf [file supp_gr.230300.117_Supplemental_Fig_S18.pdf]

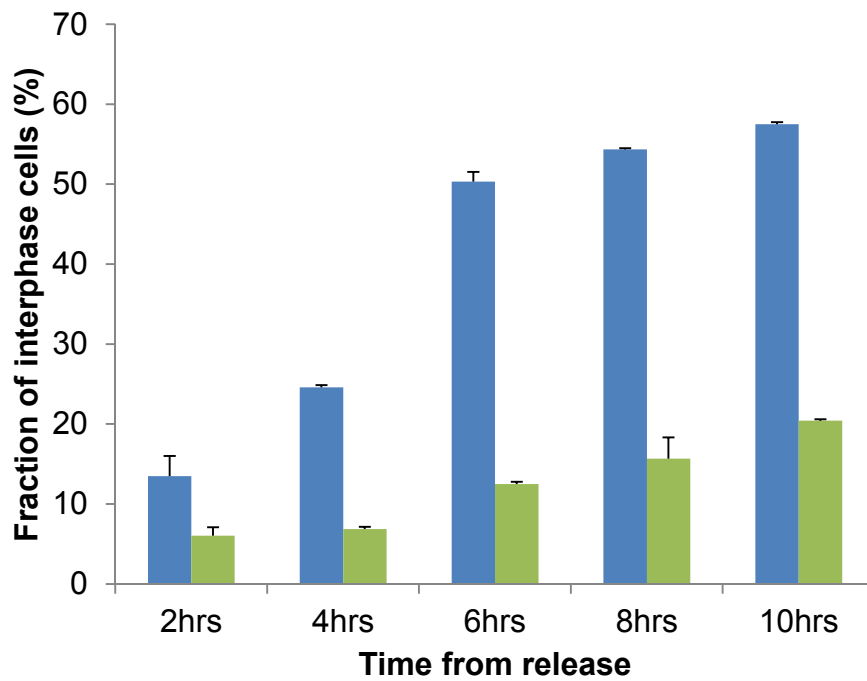

**Figure S18. Mitotic release.** Cell arrested by STC were released by changing the medium and the percentage of non-mitotic cells was measured by fluorescence microscopy (using DAPI staining). The experiments were done on both TSA treated (green) and untreated (blue) cells. Each experiment was repeated twice and average and the standard error (error bar) are shown. TSA treatment significantly ( $p$ -value = 0.03, Paired Wilcoxon test) reduces cell ability to exit mitosis.
