# Supplementary material for: Study of mitotic chromatin supports a model of bookmarking by histone modifications and reveals nucleosome deposition patterns
Source: HighWire-hosted journal article supplement (doi:10.1101/gr.230300.117), 2018-08-30
Supplement: Supplemental_Fig_S17.pdf [file Supplemental_Fig_S17.pdf]

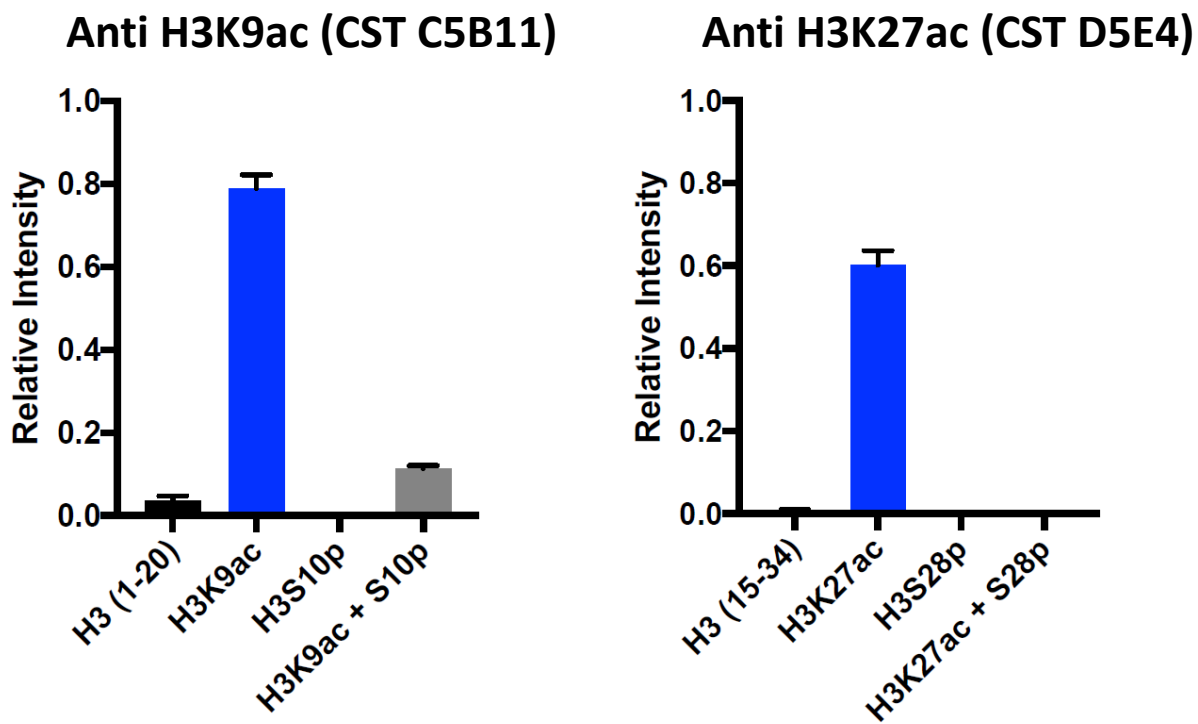

**Figure S17. Evaluation of the sensitivity of H3K9ac and H3K27ac antibodies to neighboring serine phosphorylation.** Epitope specificity of the indicated antibodies targeting H3K9ac and H3K27ac was assessed using histone peptide microarrays. These results revealed that nearby phosphorylation masks the epitopes for H3K9ac and H3K27ac antibodies. Comprehensive array datasets for these antibodies are deposited on the Histone Antibody Specificity Database ([www.histoneantibodies.com](http://www.histoneantibodies.com)).
