# Supplementary material for: Study of mitotic chromatin supports a model of bookmarking by histone modifications and reveals nucleosome deposition patterns
Source: HighWire-hosted journal article supplement (doi:10.1101/gr.230300.117), 2018-08-30
Supplement: Supplemental_Table_S1.docx [file Supplemental_Table_S1.docx]

|  | ***Group 1*** | ***Group 2*** | ***Group 3*** |
| --- | --- | --- | --- |
| **Transcribed in HeLa** | 92% | 89% | 88% |
| **Cell Cycle Genes** | 5% | 5% | 5% |
| **Housekeeping Genes** | 60% | 61% | 59% |
| **Tissue Specific Genes** | 15% | 13% | 14% |

**Supplemental table S1**

Characterization of the genes associated with each of the three groups described in **Figure 5A**.
