# Supplementary material for: Study of mitotic chromatin supports a model of bookmarking by histone modifications and reveals nucleosome deposition patterns
Source: HighWire-hosted journal article supplement (doi:10.1101/gr.230300.117), 2018-08-30
Supplement: Supplemental_Table_S2.docx [file Supplemental_Table_S2.docx]

|  |  | **p-values (*t*-test) comparing:** | | | | | |
| --- | --- | --- | --- | --- | --- | --- | --- |
| **Sample Name** | **ENCODE File Name** | **Group 1 vs Group 2** | **Group 1 vs Group 3** | **Group 2 vs Group 3** | **Group 1 vs Groups 2+3** | **Group 2 vs Groups 1+3** | **Group 3 vs Groups 1+2** |
| H2AFZ | ENCFF000BAZ | 7.72E-193 | 2.36E-93 | 6.96E-28 | 2.66E-236 | 4.06E-30 | 5.20E-44 |
| H3K4me1 | ENCFF000BBF | 1.51E-07 | 1.47E-05 | 0.081610236 | 1.11E-08 | 0.002975782 | 0.011608364 |
| H3K9me3 | ENCFF000BBL | 5.77E-27 | 1.52E-15 | 0.000890674 | 5.70E-32 | 5.47E-08 | 2.86E-06 |
| H3K27ac | ENCFF000BBR | 8.17E-125 | 1.84E-45 | 1.26E-14 | 1.60E-154 | 7.55E-13 | 1.04E-21 |
| H3K27me3 | ENCFF000BBX | 2.01E-36 | 1.06E-27 | 1.09E-05 | 8.23E-45 | 2.29E-11 | 2.21E-10 |
| H3K36me3 | ENCFF000BCD | 5.07E-11 | 1.47E-06 | 0.213756568 | 4.02E-12 | 1.08E-05 | 0.0208483 |
| H3K4me2 | ENCFF000BCJ | 6.10E-109 | 8.92E-48 | 2.55E-09 | 4.15E-130 | 4.83E-26 | 2.03E-17 |
| H3K79me2 | ENCFF000BCV | 5.58E-39 | 6.76E-20 | 0.011021178 | 4.19E-45 | 4.79E-15 | 9.01E-06 |
| H3K9ac | ENCFF000BDB | 1.13E-159 | 1.91E-63 | 3.83E-21 | 1.95E-197 | 7.94E-17 | 2.97E-31 |
| H4K20me1 | ENCFF000BDI | 1.38E-26 | 3.81E-12 | 0.153320051 | 9.36E-30 | 6.14E-12 | 0.002742448 |
| TAF1 | ENCFF000PFB | 7.63E-29 | 5.74E-08 | 0.582133318 | 8.96E-30 | 4.33E-17 | 0.275597907 |
| MYC | ENCFF000RSS | 9.62E-58 | 5.53E-16 | 0.493233571 | 3.74E-60 | 3.16E-33 | 0.080188546 |
| SMARCC1 | ENCFF000WZS | 2.58E-123 | 2.40E-53 | 0.012775236 | 1.91E-134 | 1.97E-58 | 1.65E-10 |
| SMARCC2 | ENCFF000WZY | 5.97E-63 | 8.55E-31 | 0.11974787 | 7.49E-71 | 1.89E-30 | 9.24E-06 |
| BDP1 | ENCFF000XAG | 0.063341415 | 0.39181345 | 0.089602538 | 0.069601708 | 0.054577956 | 0.189745665 |
| BRCA1 | ENCFF000XAM | 6.04E-20 | 0.001446724 | 0.945754216 | 7.68E-21 | 6.54E-08 | 0.433347187 |
| BRF1 | ENCFF000XAQ | 1.48E-07 | 7.25E-09 | 0.811363087 | 2.15E-08 | 2.43E-05 | 0.154881205 |
| BRF2 | ENCFF000XAW | 6.76E-49 | 1.38E-25 | 0.028435865 | 1.19E-53 | 3.61E-24 | 2.83E-06 |
| SMARCA4 | ENCFF000XBF | 1.34E-30 | 2.87E-19 | 0.061314288 | 3.18E-34 | 1.32E-15 | 6.06E-05 |
| CEBPB | ENCFF000XBM | 2.13E-08 | 0.090340456 | 0.002140402 | 9.71E-08 | 7.18E-09 | 0.066807355 |
| FOS | ENCFF000XBQ | 6.85E-29 | 4.35E-05 | 0.009351246 | 4.37E-30 | 2.68E-19 | 0.329589169 |
| CHD2 | ENCFF000XCA | 8.58E-20 | 0.00069549 | 0.514099456 | 3.10E-20 | 1.54E-10 | 0.680595418 |
| JUN | ENCFF000XCD | 4.72E-36 | 3.82E-16 | 0.520806711 | 1.67E-37 | 8.29E-25 | 0.05200121 |
| RCOR1 | ENCFF000XCS | 4.78E-59 | 3.82E-13 | 0.21191832 | 1.21E-58 | 3.45E-37 | 0.25606969 |
| E2F1 | ENCFF000XCY | 2.05E-06 | 1.16E-12 | 1.53E-05 | 4.88E-08 | 0.018301457 | 3.50E-08 |
| E2F4 | ENCFF000XDE | 1.27E-30 | 0.000179361 | 0.66998706 | 6.04E-32 | 2.24E-12 | 0.510858894 |
| E2F6 | ENCFF000XDK | 3.44E-10 | 0.026762738 | 0.006528928 | 1.34E-09 | 6.89E-10 | 0.153696129 |
| ELK1 | ENCFF000XDV | 1.08E-67 | 3.97E-19 | 0.524704286 | 3.88E-72 | 8.90E-32 | 0.00305409 |
| ELK4 | ENCFF000XDZ | 7.57E-106 | 2.06E-26 | 0.110468864 | 3.12E-117 | 3.48E-38 | 3.90E-05 |
| KAT2A | ENCFF000XEE | 8.88E-18 | 1.68E-09 | 0.976720318 | 2.74E-18 | 4.87E-13 | 0.060110965 |
| GTF2F1 | ENCFF000XEL | 2.03E-58 | 9.43E-31 | 0.552635636 | 2.45E-60 | 4.51E-42 | 0.001287068 |
| HA-E2F1 | ENCFF000XEQ | 3.79E-27 | 4.21E-35 | 1.06E-06 | 3.69E-30 | 3.20E-16 | 3.82E-16 |
| HCFC1 | ENCFF000XEZ | 5.01E-102 | 4.56E-31 | 0.063168374 | 5.13E-113 | 3.38E-40 | 3.81E-06 |
| SMARCB1 | ENCFF000XFH | 1.02E-23 | 1.11E-13 | 0.407207587 | 5.11E-25 | 2.27E-15 | 0.003625351 |
| IRF3 | ENCFF000XGJ | 1.24E-45 | 9.41E-07 | 0.307556742 | 2.35E-47 | 1.37E-21 | 0.601581137 |
| JUND | ENCFF000XGN | 2.67E-38 | 1.99E-13 | 0.004012578 | 1.14E-38 | 1.96E-30 | 0.962028837 |
| MAFK | ENCFF000XGZ | 6.74E-90 | 4.53E-30 | 0.025659215 | 3.54E-92 | 1.28E-61 | 0.097723307 |
| MAX | ENCFF000XHN | 5.52E-67 | 1.97E-13 | 0.062779732 | 1.61E-67 | 2.92E-41 | 0.522351825 |
| MAZ | ENCFF000XHX | 0.001410552 | 0.742936875 | 0.273017107 | 0.004274062 | 0.002887758 | 0.471587742 |
| MXI1 | ENCFF000XIF | 1.96E-67 | 2.83E-09 | 0.568879584 | 3.23E-66 | 1.04E-21 | 0.042635336 |
| NFYA | ENCFF000XIR | 9.33E-18 | 0.002807929 | 0.16771661 | 1.20E-17 | 1.44E-11 | 0.809509454 |
| NFYB | ENCFF000XIZ | 3.64E-21 | 0.000189848 | 0.292456406 | 5.97E-22 | 2.35E-12 | 0.851396781 |
| NRF1 | ENCFF000XJF | 4.61E-12 | 0.947879704 | 9.93E-09 | 2.65E-10 | 8.79E-15 | 8.71E-06 |
| EP300 | ENCFF000XJK | 4.77E-15 | 6.24E-11 | 0.917574381 | 1.20E-15 | 1.33E-11 | 0.020042847 |
| POLR2A | ENCFF000XJT | 8.52E-05 | 0.013067727 | 0.356024913 | 0.000103287 | 0.000164288 | 0.858914861 |
| POLR2AphosphoS2 | ENCFF000XJZ | 1.94E-28 | 1.59E-11 | 0.071341006 | 2.75E-28 | 1.38E-23 | 0.428982615 |
| PRDM1 | ENCFF000XKE | 6.79E-13 | 1.50E-22 | 0.465796269 | 1.61E-15 | 6.84E-08 | 0.232550923 |
| RAD21 | ENCFF000XKM | 2.30E-18 | 2.75E-05 | 0.560071103 | 7.38E-19 | 2.04E-11 | 0.471379987 |
| RFX5 | ENCFF000XKR | 0.015824842 | 0.396622059 | 0.2466942 | 0.017054046 | 0.022546423 | 0.483296227 |
| POLR3A | ENCFF000XKY | 0.411088381 | 0.440997257 | 0.054254725 | 0.48810302 | 0.261087079 | 0.038381044 |
| SMC3 | ENCFF000XLD | 7.24E-26 | 2.51E-06 | 0.705901374 | 3.07E-26 | 1.18E-14 | 0.307645659 |
| SUPT20H | ENCFF000XLJ | 3.95E-52 | 5.86E-21 | 0.017937836 | 1.88E-58 | 4.56E-20 | 1.18E-05 |
| STAT1 | ENCFF000XLN | 9.83E-08 | 2.57E-06 | 0.414882485 | 8.05E-09 | 3.43E-05 | 0.706365142 |
| STAT3 | ENCFF000XLV | 2.41E-41 | 1.14E-23 | 0.069871899 | 4.95E-46 | 1.04E-26 | 0.244692186 |
| TBP | ENCFF000XLZ | 7.28E-08 | 0.01792324 | 0.002041342 | 1.04E-07 | 1.48E-07 | 0.060110435 |
| TCF7L2 | ENCFF000XMH | 5.55E-13 | 0.000304057 | 0.62337838 | 8.63E-14 | 7.69E-08 | 0.554310532 |
| GTF3C2 | ENCFF000XMV | 1.35E-18 | 6.22E-19 | 0.005447269 | 5.93E-21 | 3.09E-10 | 9.01E-07 |
| NR2C2 | ENCFF000XNB | 2.67E-16 | 4.92E-05 | 0.23419607 | 2.16E-18 | 6.06E-05 | 0.049699009 |
| USF2 | ENCFF000XNJ | 4.37E-13 | 0.003135435 | 0.006420436 | 2.67E-13 | 1.12E-10 | 0.15514452 |
| ZKSCAN1 | ENCFF000XNR | 6.70E-18 | 1.47E-08 | 0.010446791 | 7.95E-18 | 4.36E-16 | 0.925302895 |
| ZNF143 | ENCFF000XNZ | 1.55E-17 | 1.91E-05 | 0.669630447 | 2.38E-19 | 9.95E-08 | 0.14557276 |
| ZNF274 | ENCFF000XOD | 1.96E-110 | 3.52E-45 | 0.015388877 | 3.80E-119 | 2.77E-52 | 2.81E-09 |
| ZZZ3 | ENCFF000XOJ | 4.74E-11 | 4.81E-08 | 0.389379229 | 4.24E-12 | 8.54E-07 | 0.022636232 |
| H3K4me3 | ENCFF001FKW | 2.26E-196 | 2.48E-92 | 1.35E-28 | 5.23E-239 | 5.81E-29 | 2.44E-44 |
| CTCF | ENCFF001HNE | 0.000444774 | 0.64134185 | 0.073442438 | 0.001108654 | 0.000368019 | 0.220774507 |
| RNA POLYMERASE II | N/A (our data) | 5.20E-26 | 1.97E-19 | 0.147021134 | 2.86E-28 | 5.25E-14 | 6.78E-05 |

**Supplemental Table S2**

Pairwise comparisons of the permutations of three gene groups (from **Figure 5A**) across the listed ENCODE ChIP-seq datasets. The P values were calculated using two-sided *t*-test comparing ChIP-seq reads occupancy in the TSS of genes from the various groups.
