# Supplementary material for: Study of mitotic chromatin supports a model of bookmarking by histone modifications and reveals nucleosome deposition patterns
Source: HighWire-hosted journal article supplement (doi:10.1101/gr.230300.117), 2018-08-30
Supplement: Supplemental_Table_S3.docx [file Supplemental_Table_S3.docx]

| **Sample** | **Total Read Count (after duplicate removal)** |
| --- | --- |
| rep1.S.CTCF.bam | 75,408,648 |
| rep1.Un.CTCF.bam | 58,575,350 |
| rep2.S.CTCF.bam | 74,612,424 |
| rep2.Un.CTCF.bam | 88,337,696 |
| rep1.S.H3K27ac.bam | 42,606,056 |
| rep1.Un.H3K27ac.bam | 52,245,994 |
| rep2.S.H3K27ac.bam | 20,801,714 |
| rep2.Un.H3K27ac.bam | 35,977,208 |
| rep1.S.H3K27me3.bam | 15,116,478 |
| rep1.Un.H3K27me3.bam | 14,662,580 |
| rep2.S.H3K27me3.bam | 28,582,046 |
| rep2.Un.H3K27me3.bam | 29,019,248 |
| rep1.S.H3K36me3.bam | 13,649,550 |
| rep1.Un.H3K36me3.bam | 13,443,590 |
| rep2.S.H3K36me3.bam | 30,462,742 |
| rep2.Un.H3K36me3.bam | 28,333,458 |
| rep1.S.H3K4me1.bam | 19,675,660 |
| rep1.Un.H3K4me1.bam | 14,565,092 |
| rep2.S.H3K4me1.bam | 50,685,230 |
| rep2.Un.H3K4me1.bam | 35,625,110 |
| rep1.S.H3K4me3.bam | 22,553,978 |
| rep1.Un.H3K4me3.bam | 12,746,762 |
| rep2.S.H3K4me3.bam | 33,552,244 |
| rep2.Un.H3K4me3.bam | 34,003,260 |
| rep1.S.H3K4me3-TSA.bam | 44,152,652 |
| rep1.Un.H3K4me3-TSA.bam | 37,568,754 |
| rep1.S.H3K9ac.bam | 35,446,602 |
| rep1.Un.H3K9ac.bam | 41,031,472 |
| rep2.S.H3K9ac.bam | 27,088,430 |
| rep2.Un.H3K9ac.bam | 26,816,904 |
| rep1.S.H3K9ac-TSA.bam | 41,637,156 |
| rep1.Un.H3K9ac-TSA.bam | 37,589,734 |
| rep2.S.H3K9ac-TSA.bam | 41,139,970 |
| rep2.Un.H3K9ac-TSA.bam | 34,805,906 |
| rep1.S.rnaPolII.bam | 3,697,065 |
| rep1.Un.rnaPolII.bam | 3,734,972 |
| rep2.S.rnaPolII.bam | 3,733,791 |
| rep2.Un.rnaPolII.bam | 3,731,614 |
| rep1.S.WCE.bam | 38,929,614 |
| rep1.Un.WCE.bam | 41,110,648 |
| rep2.S.WCE.bam | 33,997,868 |
| rep2.Un.WCE.bam | 33,370,908 |

**Supplemental Table S3**

Total read count for the sequenced libraries (after duplicate removal).
